# Supplementary material for: Models for estimating and projecting global, regional and national prevalence and disease burden of asthma: protocol for a systematic review
Source: BMJ Open. 2017 May 17;7(5):e015441. doi: 10.1136/bmjopen-2016-015441 (PMC5791547; doi:10.1136/bmjopen-2016-015441)
Supplement: Supplementary data [file bmjopen-2016-015441supp001.pdf]

## **Supplementary APPENDIX**

### **Search Strategies Developed for MEDLINE**

1. exp Asthma/
2. Respiratory Sounds/
3. wheez\$.mp.
4. Bronchial Spasm/
5. bronchospas\$.mp.
6. (bronch\$ adj3 spasm\$).mp.
7. bronchoconstrict\$.mp.
8. asthma\$.mp.
9. (antiasthma\$ or anti-asthma\$).mp.
10. exp Bronchoconstriction/
11. (bronch\$ adj3 constrict\$).mp.
12. Bronchial Hyperreactivity/
13. Respiratory Hypersensitivity/
14. ((bronchial\$ or respiratory or airway\$ or lung\$) adj3 (hypersensitiv\$ or hyperreactiv\$ or allerg\$ or insufficiency)).mp.
15. or/1-14
16. Epidemiology/
17. morbidity/ or incidence/ or prevalence/ or mortality/
18. (disability-adjusted life years or disability adjusted life years or DALY\$).mp.
19. Quality-Adjusted Life Years/ or (quality adjusted life years or QALY\$).mp.
20. years lived with disability.mp.
21. years life lost.mp.
22. potential years of life lost.mp.

23. healthy years of life lost.mp.
24. active life expectancy.mp.
25. (disability-free life expectancy or disability free life expectancy).mp.
26. (disability-adjusted life expectancy or disability adjusted life expectancy).mp.
27. (Healthy life expectancy or HALE).mp.
28. (quality adjusted life expectancy or quality-adjusted life expectancy).mp.
29. vital statistics/ or life expectancy/ or life tables/
30. "costs and cost analysis"/ or "cost of illness"/ or health care costs/ or drug costs/ or  
hospital costs/ or health expenditures/
31. Hospitalization/ or hospitalisation.mp.
32. Primary Health Care/ or Ambulatory Care/ or Emergency Service, Hospital/ or  
absentee\$.mp.
33. burden\$.mp.
34. or/16-33
35. model\$.mp. or exp models, statistical/ or exp regression analysis/ or odds ratio/ or  
monte carlo method/ or markov chains/ or Markov.mp.
36. (estimat\$ or projection\$ or projecting).ti.
37. exp Forecasting/
38. or/35-37
39. 15 and 34 and 38

## Search Strategies Developed for EMBASE

1. exp asthma/
2. asthma\$.mp.
3. (antiasthma\$ or anti-asthma\$).mp.
4. abnormal respiratory sound/
5. wheez\$.mp.
6. bronchospasm/
7. bronchospas\$.mp.
8. (bronch\$ adj3 spasm\$).mp.
9. bronchoconstrict\$.mp.
10. bronchoconstriction/
11. (bronch\$ adj3 constrict\$).mp.
12. bronchus hyperreactivity/
13. respiratory tract allergy/
14. ((bronchial\$ or respiratory or airway\$ or lung\$) adj3 (hypersensitiv\$ or hyperreactiv\$ or allerg\$ or insufficiency)).mp.
15. or/1-14
16. epidemiology/
17. Prevalence/ or Incidence/ or Morbidity/ or Mortality/
18. burden\$.mp.
19. (disability-adjusted life years or disability adjusted life years or DALY\$).mp.
20. quality adjusted life year/ or (quality-djusted life years or QALY\$).mp.
21. years lived with disability.mp.
22. years life lost.mp.
23. potential years of life lost.mp.

24. healthy years of life lost.mp.
25. Vital statistics/ or Life expectancy/ or Life tables/
26. active life expectancy.mp.
27. (disability-free life expectancy or disability free life expectancy).mp.
28. (disability-adjusted life expectancy or disability adjusted life expectancy).mp.
29. (Healthy life expectancy or HALE).mp.
30. (quality adjusted life expectancy or quality-adjusted life expectancy).mp.
31. "health care cost"/ or "drug cost"/ or "hospital cost"/ or "hospitalization cost"/ or  
"cost"/ or "cost of illness"/
32. hospitalization/ or Hospitalisation.mp.
33. primary health care/ or medical care/ or emergency care/ or emergency treatment/ or  
emergency health service/ or ambulatory care/ or absenteeism/
34. or/16-33
35. model/ or loglinear model/ or population model/ or mathematical model/ or  
proportional hazards model/ or statistical model/ or stochastic model/ or markov  
chain/ or Markov.mp.
36. (estimat\$ or projection\$ or projecting).mp.
37. "prediction and forecasting"/
38. or/35-37
39. 15 and 34 and 38

## Model evaluation checklist and scoring framework

### Checklist

| Checklist item                                                                                                                                                                                                                                                                                                                                                                                                                                                                                                                                                                                               | Score obtained<br>(Yes = 1, No = 0) |
|--------------------------------------------------------------------------------------------------------------------------------------------------------------------------------------------------------------------------------------------------------------------------------------------------------------------------------------------------------------------------------------------------------------------------------------------------------------------------------------------------------------------------------------------------------------------------------------------------------------|-------------------------------------|
| <b>Strength</b>                                                                                                                                                                                                                                                                                                                                                                                                                                                                                                                                                                                              |                                     |
| <b>Objective/purpose:</b><br>1. Whether there is clear statement about the questions that the model aimed to answer                                                                                                                                                                                                                                                                                                                                                                                                                                                                                          |                                     |
| <b>Model formulation and transparency:</b><br>Whether there is clear description about <ol style="list-style-type: none"> <li>1. model structure or model statement (including formula)</li> <li>2. model specification</li> <li>3. model assumptions</li> <li>4. model derivation</li> <li>5. variable used in the model (response, predictors, potential confounders, lag time)</li> <li>6. method of parameter estimation and inference</li> <li>7. model building (variable selection) process</li> <li>8. model diagnostic and adequacy checking</li> <li>9. theoretical ground of the model</li> </ol> |                                     |
| <b>Data:</b><br>Whether there is clear description about <ol style="list-style-type: none"> <li>1. source of data</li> <li>2. method of data collection (study design)</li> <li>3. sample size and determination process</li> <li>4. method of assessment (data measurement)</li> </ol>                                                                                                                                                                                                                                                                                                                      |                                     |
| <b>Model findings:</b><br>Whether following information are available <ol style="list-style-type: none"> <li>1. necessary estimates (prevalence/burden measure/incidence)</li> <li>2. standard errors and 95% confidence intervals of the estimates</li> <li>3. model fit information</li> <li>4. compliance of the model findings with real scenario</li> </ol>                                                                                                                                                                                                                                             |                                     |
| <b>Model validation:</b><br>1. Whether model validation was performed                                                                                                                                                                                                                                                                                                                                                                                                                                                                                                                                        |                                     |
| <b>Limitation</b>                                                                                                                                                                                                                                                                                                                                                                                                                                                                                                                                                                                            |                                     |
| <b>Sensitivity analysis:</b><br>1. Whether sensitivity analyses was carried out                                                                                                                                                                                                                                                                                                                                                                                                                                                                                                                              |                                     |
| <b>Addressing missing data</b><br>1. Whether there is explanation about how missing data were addressed                                                                                                                                                                                                                                                                                                                                                                                                                                                                                                      |                                     |
| <b>Dissemination and expert involvement:</b><br>1. Whether model was disseminated prior to final development of model<br>2. Whether expert opinion were incorporated to develop the model                                                                                                                                                                                                                                                                                                                                                                                                                    |                                     |
| <b>Policymakers involvement:</b><br>1. Whether policymakers were involved in the model development<br>2. Whether any policy was recommended on the basis of model derived findings                                                                                                                                                                                                                                                                                                                                                                                                                           |                                     |
| <b>Limitation discussed in the paper:</b><br>Whether potential methodological limitations of the model were discussed                                                                                                                                                                                                                                                                                                                                                                                                                                                                                        |                                     |

| <b>Reproducibility</b>                                                                                                                                                                                                                                                          |  |
|---------------------------------------------------------------------------------------------------------------------------------------------------------------------------------------------------------------------------------------------------------------------------------|--|
| <b>Reproducibility:</b> <ol style="list-style-type: none"> <li>1. Whether model is available and accessible to user</li> <li>2. Whether data are available</li> <li>3. Whether codes are available</li> <li>4. Whether user manual to develop the model is available</li> </ol> |  |

### **Scoring framework**

| <b>Criteria</b> | <b>Item</b>                          | <b>Score assigned</b> | <b>Score obtained</b> |
|-----------------|--------------------------------------|-----------------------|-----------------------|
| Strength        | Objectives of the model              | 1                     |                       |
|                 | Model formulation and transparency   | 9                     |                       |
|                 | Data                                 | 4                     |                       |
|                 | Model findings                       | 4                     |                       |
|                 | Model validation                     | 1                     |                       |
| Limitation      | Sensitivity analysis                 | 1                     |                       |
|                 | Addressing missing data              | 1                     |                       |
|                 | Dissemination and expert involvement | 2                     |                       |
|                 | Policymakers involvement             | 2                     |                       |
|                 | Limitation discussed in the paper    | 1                     |                       |
| Reproducibility | Reproducibility of the model         | 4                     |                       |
| Total           |                                      | 30                    |                       |
